# Supplementary material for: circIFT80 Functions as a ceRNA for miR-142, miR-568, and miR-634 and Promotes the Progression of Colorectal Cancer by Targeting β-Catenin
Source: Hindawi journal article supplement (doi:10.1155/2022/8081246), 2022-06-23
Supplement: f2 [file 8081246.f2.pdf]

Table 1. Clinical data of CRC patients

| Number | Gender | Age | T   | N   | M  | TNM        |
|--------|--------|-----|-----|-----|----|------------|
| 1      | Male   | 79  | T2  | N0  | M0 | Grade I    |
| 2      | Male   | 56  | T1  | N0  | M0 | Grade I    |
| 3      | Female | 86  | T3  | N0  | M0 | Grade II A |
| 4      | Male   | 55  | T2  | N0  | M0 | Grade I    |
| 5      | Male   | 66  | T2  | N1  | M0 | Grade IIIA |
| 6      | Male   | 71  | T3  | N2b | M0 | Grade IIIC |
| 7      | Male   | 63  | T4a | N0  | M0 | Grade II B |
| 8      | Female | 57  | T3  | N0  | M0 | Grade II A |
| 9      | Male   | 51  | T1  | N1  | M0 | Grade IIIA |
| 10     | Male   | 64  | T3  | N0  | M0 | Grade II A |
| 11     | Female | 58  | T3  | N1  | M0 | Grade IIIB |
| 12     | Female | 66  | T3  | N0  | M0 | Grade II A |
| 13     | Male   | 61  | T3  | N1b | M0 | Grade IIIB |
| 14     | Female | 53  | T3  | N0  | M0 | Grade II A |
| 15     | Male   | 55  | T4a | N0  | M0 | Grade II C |
| 16     | Female | 75  | T4a | N0  | M0 | Grade II C |
| 17     | Male   | 54  | T4a | N1  | M0 | Grade IIIB |
| 18     | Female | 56  | T4a | N2a | M0 | Grade IIIC |

**Table 2. Primer sequences used in Quantitative RT-PCR**

| <b>miRNAs</b> | <b>sequence</b>       |
|---------------|-----------------------|
| hsa-miR-142 F | CATAAAGTAGAAAGCACTACT |
| hsa-miR-142 R | GTGCGTGTCGTGGAGTCG    |
| hsa-miR-568 F | ATGTATAAATGTATACACAC  |
| hsa-miR-568 R | GTGCGTGTCGTGGAGTCG    |
| hsa-miR-634 F | AACCAGCACCCCACTTTGGAC |
| hsa-miR-634 R | GTGCGTGTCGTGGAGTCG    |
| U6 F          | CTCGCTTCGGCAGCACA     |
| U6 R          | AACGCTTCACGAATTTGCGT  |

**Table 3. Biotin-labeled miRNA probes**

| <b>miRNAs</b>             | <b>sequence</b>                     |
|---------------------------|-------------------------------------|
| hsa-miR-142 probe         | 5'-CAUAAAGUAGAAAGCACUACU-biotin-3'  |
| hsa-miR-142 control probe | 5'-TCATCACGAAAGATGAAATAC-biotin-3'  |
| hsa-miR-568 probe         | 5'-AUGUAUAAAUGUAUACACAC-biotin-3'   |
| hsa-miR-568 control probe | 5'-CACACATATGTAAATATGTA-biotin-3'   |
| hsa-miR-634 probe         | 5'-AACCAGCACCCCAACUUUGGAC-biotin-3' |
| hsa-miR-634 control probe | 5'-CAGGTTTCAACCCACGACCAA-biotin-3'  |
